# 1 Factors associated with Low birth weight in Cambodia: A secondary analysis 2 of Cambodia Demographic and Health Survey, 2021-2022

3  
4 Samnang Um<sup>1\*</sup>¶, Sok Sakha<sup>2</sup>¶, Leng Dany<sup>2</sup>¶

5 [\\*umsamng56@gmail.com](mailto:umsamng56@gmail.com)

6 1- National Institute of Public Health, Phnom Penh, Cambodia

7 2- Elite Angkor Clinic, Siem Reap, Cambodia

8 ¶These authors contributed equally to this work.

## 9 10 Abstract

11  
12 Low birth weight (LBW) is a serious global health concern, including in Cambodia. It is associated  
13 with a higher risk of neonatal, infant, and under-five mortality and morbidity. We examined the  
14 prevalence of LBW across provinces and factors associated with LBW among newborns in  
15 Cambodia. We analyzed the most recent children's data from the Cambodia Demographic and  
16 Health Survey (CDHS) 2021-2022. There were 4,565 weighted newborns included in this study.  
17 The provincial variation in the prevalence of LBW was done using ArcGIS. Multiple logistic  
18 regression analyses were conducted to assess factors independently associated with LBW. The  
19 prevalence of LBW was 5.9% (95% CI: 5.2–6.8), which was highest in Ratanak Kiri (13.9%),  
20 Kratie (12.8%), Pailin (12.7%), and Svay Rieng (10.2%). Factors were independently associated  
21 with LBW, including mothers with primary education (AOR = 1.82; 95% CI: 1.09–3.04),  
22 unemployed (AOR = 1.62; 95% CI: 1.03–2.55), being a first-born child (AOR = 1.74; 95% CI:  
23 1.24–2.45), born to mothers in rural areas (AOR = 1.42; 95% CI: 1.00–2.01). However, mothers  
24 who attended at least 4 ANC visits had lower odds of LBW (AOR = 0.65; 95% CI: 0.47–0.91).  
25 The prevalence of LBW among newborns in Cambodia is lower than in Southsea Asia and  
26 worldwide. However, provincial variations in the prevalence of LBW were high in remote areas.  
27 Public Health programs should target provinces where LBW prevalence remains high. Cambodia  
28 policy continues to recommend four or more ANC visits to pregnant women, particularly those  
29 who have limited education and live in rural areas.

30  
31 **Keywords:** Low birth weight, Newborn, Cambodia Demographic and Health Survey

## 33 **Introduction**

34

35 Newborn low birth weight (LBW) is defined as a weight at birth of less than 2500 grams (or 5.5  
36 pounds) by the World Health Organization (WHO) [1]. LBW is a serious public health issue  
37 affecting developed and developing nations [1]. Globally, in 2020, an estimated 19.8 million (or  
38 14.6%) live births were suffering from LBW [1,2]. According to estimates, LBW is more common  
39 in South Asia (28%), East Asia and the Pacific (6%), sub-Saharan Africa (13%), and Latin America  
40 (9%) [3,4]. Compared to East Asia and the Pacific as a whole, Cambodia has a higher proportion  
41 of LBW. World Bank data shows that 11% of newborns were LBW in 2000. After that, prevalence  
42 declined to around 8% of all live births in 2005 [5] and has remained stable at about 8% in 2010  
43 and 7.9 in 2014 but slightly declined to about 5.9% in 2021-22 [5-7]. However, newborns with  
44 LBW are more common in rural areas (7.2%) than in urban areas (4%). The highest rates of LBW  
45 were seen in remote and low-income provinces like Ratanakiri (14.8%), Pailin (12.9%),  
46 Mondolkiri (10.7%), and Stung Treng (10.2%) in 2021–22 [7]. Approximately 2.04% of all deaths  
47 were related to LBW in Cambodia [8]. Furthermore, compared to newborns with normal birth  
48 weight, those with LBW had over five times increased risk of dying before turning five years old  
49 [9]. Children's mortality and morbidity are independently associated with newborns with LBW  
50 [10,11]. Also, it increases the risk for chronic non-communicable diseases (NCDs), such as  
51 diabetes and cardiovascular disease, in adulthood [1,12,13]. Lack of iron folic acid (IFA)  
52 supplementation and deworming during pregnancy[14], maternal weight gain [15], preterm birth  
53 [16], mothers having inadequate antenatal care visits [17], anemic [18], underweight mothers  
54 during pregnancy [19], use of tobacco [20], and alcohol consumption during pregnancy [21] were  
55 associated with increased risk of LBW. Therefore, the risk of LBW is 3.8 times higher for mothers  
56 who are under 20 years or over 35 years compared to mothers who are between the ages of 20-35  
57 years [22]. In general, mothers of low socio-economic status commonly have LBW babies. For  
58 example, mothers from the poorest (AOR = 1.7) and middle-income households (AOR = 1.6) were  
59 more likely to deliver LBW babies than the richest mothers [23]. A previous study in Cambodia  
60 indicated that factors independently associated with increased odds of LBW included the mother's  
61 no education with an adjusted odds ratio (AOR = 1.6), babies born to mothers with less than four  
62 antenatal care (ANC) visits during the pregnancy (AOR = 2.0) [17].

63 The Royal Government of Cambodia (RGC) has recognized that nutrition is the highest priority  
64 program in Cambodia and has been closely monitored by the Cambodian Prime Minister to enforce  
65 policy implementation to reach the Sustainable Development Goal [24]. Cambodia aims to reduce  
66 LBW to less than 6% in 2023 and 4% in 2025 [24]. To reduce LBW, the government has taken  
67 different strategies such as counseling during ANC visits, routine supplementation of IFA to  
68 pregnant women, providing nutritious food such as super cereals to pregnant women residing in  
69 highly food insecure areas, and awareness of early pregnancy, smoking, and alcohol during  
70 pregnancy [14]. Despite these efforts, the prevalence of LBW remains a significant public health  
71 problem in Cambodia. The proportion of LBW in Cambodia has slowly decreased in newborns  
72 during 2010–2022, particularly among remote provinces and vulnerable mothers [5-7]. In addition,  
73 LBW has been documented as an independent factor associated with childhood malnutrition  
74 [1,2,25], infectious disease [1,4,26], and risk of under-five mortality in Cambodia [1,4,9]. To the  
75 authors' knowledge, a limited study investigated the association between socio-economic and  
76 maternal factors and LBW using updated data, which has not been explored. A prior study  
77 described the prevalence of LBW across provinces in Cambodia, and its associated factors have  
78 been utilized since 2014 [17]. Therefore, this study aimed to examine the prevalence of LBW  
79 across provinces and factors associated with LBW among newborns in Cambodia using updated  
80 CDHS 2021-22 data. Hence, this study would help better understand the maternal, child, and  
81 household socio-economic factors of LBW among newborns in Cambodia and may help develop  
82 policies and programs with more effective strategies and interventions to reduce the prevalence of  
83 LBW, thereby contributing further to the reduction of newborn mortality in Cambodia.

84

85

## 86 **Material and Methods**

87

## 88 **Ethics Statement**

89

90 The CDHS survey was approved by the National Ethical Committee for Health Research, Ministry  
91 of Health of Cambodia on May 10, 2021 (**Ref: 083 NECHR**), and the Institutional Review Board  
92 (IRB) of ICF in Rockville, Maryland, USA. Which are publicly accessible upon request through  
93 the DHS website at (URL: <https://dhsprogram.com/data/available-datasets.cfm>) [27]. Before

94 conducting the interview, field researchers explained the objective of the survey to  
95 the parents/guardians of each participant under 18 years of age, and written informed consent was  
96 obtained from their parents/guardians.

97

98

## 99 **Data sources**

100

101 We followed the methods of Chhea et al. 2018 [17]. To analyze the prevalence of LBW across  
102 provinces and factors associated with LBW among newborns in Cambodia. This study was a  
103 retrospective secondary data analysis using children's data (KR file) from the most recent CDHS  
104 2021–22, a nationally representative population-based household survey from September 15,  
105 2021, to February 15, 2022. To select participants from every province, CDHS employed a two-  
106 stage stratified cluster sampling technique [7]. In the first stage, 709 clusters, or enumeration areas  
107 (EAs), were selected (241 EAs from urban areas and 468 EAs in rural areas). In the second stage,  
108 a systematic random sample was applied between 25-30 households from each cluster or EA for a  
109 total sample size of 21,270 families. Interviews were then conducted with 19,496 women aged 15–  
110 49 who had birth five years before the survey, with a response rate of 98.2%. About 8,153  
111 children's information was collected from their mothers [7]. Our analysis was restricted to the last  
112 pregnancy with the most recent live births two years preceding the survey and reported birth  
113 weight. As a result, we excluded 3,295 not-last births and 187 newborns with missing birth weight  
114 data. A final sample included in this analysis was 4,671 newborns (4,565 weighted counts).

115

116

## 117 **Measurements**

118

### 119 **Outcome variable**

120

121 The birth weight of the newborn was the outcome variable. LBW is defined as a weight at birth of  
122 less than 2500 grams [1]. Then, the original variable was recoded into the binary variable, where  
123 non-LBW= 0 (if birth weight  $\geq$  2,500 grams) and LBW= 1 (if birth weight  $<$  2,500 grams).

124

## 125 **Independent variables**

126

127 **Maternal characteristics included:** Women's age in years ( $\leq 19$ , 20-29,  $\geq 30$ ), marital status  
128 (married, not married), and education (no education, primary, and secondary/higher). Employment  
129 status (not working, non-professional, and professional). Having the first ANC visit in the first  
130 trimester of pregnancy (yes, no), the number of ANC visits (less than 4 visits, 4 or more visits),  
131 having ANC provided by skilled personnel such as a medical doctor, nurse, or midwife (yes, no),  
132 receiving a tetanus injection (not, one dose, two or more), giving iron tablets during pregnancy,  
133 and intestinal parasite medication (yes, no), and having adequate ANC components was defined  
134 six interventions including blood pressure measurement, blood sample collected, urine sample  
135 collected, health and nutrition education, ultrasound conducted, and counseling on danger signs.  
136 Types of delivered (normal birth, cesarean birth), and place of delivered (home, health facilities).  
137 Maternal smoking cigarettes (non-smoker vs smoker) and alcohol drinking (no, yes). Healthcare  
138 barriers (no barrier, one or more possible barriers reported included distance, money, and waiting  
139 time), and health insurance coverage (yes, no). **Child characteristics** included sex of child (male,  
140 female), birth interval (first child, < 2 years, 2-3 years, and 3+), and birth order (1, 2-3, 4+). **Socio-**  
141 **economic characteristics** included households' wealth index (poorest, poorer, middle, richer,  
142 richest). The wealth index is calculated via principal component analysis (PCA) using variables  
143 for household assets and dwelling characteristics [7], type of toilet facility (improved,  
144 unimproved), and source of drinking water (improved, unimproved). Place of residence (rural,  
145 urban). Cambodia's provinces were regrouped for analytic purposes into a categorical variable  
146 with four geographical regions: plains, Tonle Sap, coastal/sea, and mountains.

147

## 148 **Statistical Analysis**

149

150 Statistical analyses were performed using STATA version 18 (Stata Corp 2021, College Station,  
151 TX). We formally incorporated the DHS's complex sample design using the "survey" package; all  
152 estimations were carried out using the **svy** command in our descriptive and logistic regression  
153 analyses. Descriptive statistics for the maternal, child, and household socio-economics  
154 characteristics were described using weighted frequency distributions. The provincial variation in

155 the prevalence of LBW was done using ArcGIS software version 10.8 [28]. A shapefile for  
156 Cambodian administrative boundaries was obtained from the United Nations for Coordination of  
157 Humanitarian Affairs (OCHA) (URL: <https://data.humdata.org/dataset/cod-ab-khm?>). License  
158 (URL: <https://data.humdata.org/faqs/licenses>). Bivariate analysis using Chi-square tests assessed  
159 associations between independent variables (maternal, child, and household socio-economics  
160 characteristics) and LBW. The final multiple logistic regression analyses included variables  
161 associated with LBW at  $p\text{-value} \leq 0.10$  [25] or that had a potential confounder variable, including  
162 maternal age at the time of giving birth. Simple logistic regression determined the magnitude of  
163 associations between LBW and maternal, child, and household socio-economic characteristics.  
164 Results are reported as odds ratios (OR) with 95% confidence intervals (CI). Multiple logistics  
165 regression was then used to assess independent factors associated with LBW after adjusting for  
166 other potential confounding factors in the model. Results from the final adjusted model are  
167 reported as adjusted odds ratios (AOR) with 95% CI and corresponding p-values. Multicollinearity  
168 between independent variables was checked before fitting the final regression model, including  
169 maternal age at the time of giving birth, educational level, employment status, number of ANC  
170 visits during pregnancy, child's birth order, wealth index, and place of residence. The result of  
171 evaluating variance inflation factor (VIF) scores after fitting the regression model with the mean  
172 = 1.20 indicated no collinearity concerns [29].

## 173 Results

174

### 175 Characteristics of the study samples

176

177 **Table 1** describes the household socio-demographic characteristics of the 4,565 last births  
178 newborns with the most recent live births in the two years preceding the survey, including their  
179 reported birth weight and the characteristics of their mothers. Nearly 70% of the mothers were age  
180 20–29 at the time of childbirth, and 11% of the mothers had no schooling, 40.4% had a primary  
181 education, 49.1% had a secondary or higher education, 31% had no working, and about 95% of  
182 mothers were married. Only 1.1% of the mothers smoked cigarettes, while 36.3% reported  
183 drinking alcohol in the past few months. Most mothers (86.3%) attended at least four ANC visits  
184 during pregnancy. Likewise, 87.8% initiated ANC within the first trimester of pregnancy, and 98.7%  
185 attended with a skilled provider. The majority (89.1%) of mothers consumed iron supplements,  
186 and more than eight-ten (82.3%) of the mothers took parasite medication during pregnancy. About  
187 60.7% of the mothers received adequate ANC components. Approximately 24.8% of mothers have  
188 health insurance. Newborns delivered at the hospital were (96.8%). Over half of the newborns  
189 were boys; singleton births were 99.5%. Among the sample, 99.1%% live births. Their average  
190 weight at birth was 3,088 grams. 32.4% of newborns are 1st order births, and 10.2% are 4<sup>th</sup> or  
191 high-order births. About 40.2% of newborns were born into low-wealth index households, and  
192 60.8% were born in rural areas (see **Table 1**).

193

194 **Table 1.** Descriptive statistics of the latest children, mothers, and household socio-demographic  
195 characteristics were included in the study, CDHS 2021-2022 (N = 4,565 weighted count).

196

| Variables                              | Total Births | %    |
|----------------------------------------|--------------|------|
| <b>Maternal Characteristics</b>        |              |      |
| <b>Age at the time of giving birth</b> |              |      |
| ≤ 19                                   | 1,083        | 23.7 |
| 20-29                                  | 3,145        | 68.9 |
| ≥ 30                                   | 338          | 7.4  |
| <b>Educational level</b>               |              |      |
| No education                           | 484          | 10.6 |
| Primary                                | 1,842        | 40.4 |
| Secondary/higher                       | 2,240        | 49.1 |
| <b>Employment status</b>               |              |      |
| Not working                            | 1395         | 30.6 |
| Professional                           | 1273         | 27.9 |

|                                                   |                        |      |
|---------------------------------------------------|------------------------|------|
| Non-professional                                  | 1897                   | 41.6 |
| <b>Marital status</b>                             |                        |      |
| Not married                                       | 231                    | 5.1  |
| Married                                           | 4,334                  | 94.9 |
| <b>Smoking cigarettes</b>                         |                        |      |
| Non-Smoker                                        | 4,515                  | 98.9 |
| Smoker                                            | 50                     | 1.1  |
| <b>Alcohol intake in the past month</b>           |                        |      |
| No                                                | 2,910                  | 63.7 |
| Yes                                               | 1,655                  | 36.3 |
| <b>Number of ANC visits during pregnancy</b>      |                        |      |
| < 4 visits                                        | 625                    | 13.7 |
| ≥ 4 visits                                        | 3,940                  | 86.3 |
| <b>First ANC visit in the first trimester</b>     |                        |      |
| No                                                | 501                    | 11.0 |
| Yes                                               | 4,007                  | 87.8 |
| <b>Antenatal care from a skilled provider</b>     |                        |      |
| Unskilled                                         | 61                     | 1.3  |
| Skilled                                           | 4,504                  | 98.7 |
| <b>Tetanus toxoid injections during pregnancy</b> |                        |      |
| None                                              | 767                    | 16.8 |
| One dose                                          | 666                    | 14.6 |
| Two or more                                       | 3,133                  | 68.6 |
| <b>Iron supplementation during pregnancy</b>      |                        |      |
| No                                                | 499                    | 10.9 |
| Yes                                               | 4,067                  | 89.1 |
| <b>Parasite medication during pregnancy</b>       |                        |      |
| No                                                | 806                    | 17.7 |
| Yes                                               | 3,759                  | 82.3 |
| <b>Compliance with ANC components</b>             |                        | 0.0  |
| Inadequate                                        | 1,797                  | 39.4 |
| Adequate                                          | 2,769                  | 60.7 |
| <b>Healthcare Barriers</b>                        |                        |      |
| No barrier                                        | 1,869                  | 40.9 |
| One or More Barriers                              | 2,696                  | 59.1 |
| <b>Health insurance coverage</b>                  |                        |      |
| No                                                | 3,432                  | 75.2 |
| Yes                                               | 1,133                  | 24.8 |
| <b>Child's characteristics</b>                    |                        |      |
| <b>Place of birth</b>                             |                        |      |
| Home                                              | 147                    | 3.2  |
| Health facilities                                 | 4,418                  | 96.8 |
| <b>Sex of child</b>                               |                        |      |
| Female                                            | 2,233                  | 48.9 |
| Male                                              | 2,332                  | 51.1 |
| Single birth                                      | 4,544                  | 99.5 |
| Alive after birth                                 | 4,525                  | 99.1 |
| Average birth weight (SD)                         | 3,088 grams (SD = 9.8) |      |
| Max-Min                                           | 500 - 5500 grams       |      |
| <b>Child's birth interval (year)</b>              |                        |      |
| First child                                       | 1,479                  | 32.4 |
| < 2 years                                         | 305                    | 6.7  |
| 2-3 years                                         | 500                    | 11.0 |
| Three or more                                     | 2,281                  | 50.0 |
| <b>Child's birth order</b>                        |                        |      |
| 1st child                                         | 1,479                  | 32.4 |



|                                  |       |      |
|----------------------------------|-------|------|
| 2-3 child                        | 2,619 | 57.4 |
| Four or more                     | 467   | 10.2 |
| <b>Type of delivery</b>          |       |      |
| Normal Delivery                  | 3,717 | 81.4 |
| Cesarean Section                 | 848   | 18.6 |
| <b>Household characteristics</b> |       |      |
| <b>Wealth index</b>              |       |      |
| Poor                             | 1,835 | 40.2 |
| Middle                           | 847   | 18.6 |
| Rich                             | 1,883 | 41.2 |
| <b>Type of toilet facility</b>   |       |      |
| Improved                         | 4,000 | 87.6 |
| Non-Improved                     | 565   | 12.4 |
| <b>Source of drinking water</b>  |       |      |
| Improved                         | 2,747 | 60.2 |
| Unimproved                       | 1,818 | 39.8 |
| <b>Place of residence</b>        |       |      |
| Urban                            | 1,789 | 39.2 |
| Rural                            | 2,776 | 60.8 |
| <b>Geographic Region</b>         |       |      |
| Plain                            | 2,239 | 49.0 |
| Tonle Sap                        | 1,408 | 30.8 |
| Coastal                          | 270   | 5.9  |
| Plateau/Mountain                 | 649   | 14.2 |

197  
198  
199  
200  
201  
202

**Notes:** Survey weights are applied to obtain weighted percentages. \***Plains:** Phnom Penh, Kampong Cham, Tbong Khmum, Kandal, Prey Veng, Svay Rieng, and Takeo; **Tonle Sap:** Banteay Meanchey, Kampong Chhnang, Kampong Thom, Pursat, Siem Reap, Battambang, Pailin, and Otdar Meanchey; **Coastal/sea:** Kampot, Kep, Preah Sihanouk, and Koh Kong; **Mountains:** Kampong Speu, Kratie, Preah Vihear, Stung Treng, Mondul Kiri, and Ratanak Kiri.

## 204 **Distribution of newborns with LBW by provinces**

205  
206 The prevalence of low birth weight was 5.9% (95% CI: 5.2–6.8). And low birth weight is highest  
207 among newborn in Ratanak Kiri (13.9%), Kratie (12.8%), Pailin (12.7%), Svay Rieng (10.2%),  
208 Stung Treng (9.2%), Tboung Khmum (8.3%) and lowest among newborn in Kampong Speu  
209 (1.5%), Banteay Meanchey (2.5%) and Pursat (2.6%), and Kampong Chhnang (2.7%) (See **Fig 1,**  
210 **and S1 Table**).

211  
212  
213  
214  
215 **Fig 1.** Prevalence of newborns with low birth weight by province. The map was created using  
216 ArcGIS software version 10.8 [28]. A shapefile for Cambodian administrative boundaries was  
217 obtained from the United Nations for Coordination of Humanitarian Affairs (OCHA)  
218 (<https://data.humdata.org/dataset/cod-ab-khm?>). License (<https://data.humdata.org/faqs/licenses>).

## 222 **Factors associated with LBW among the most recent live births**

223  
224 In bivariate Chi-square test presents the prevalence of LBW by independent variables, household  
225 and mother's characteristics and behaviors, access to health care during pregnancy, health  
226 insurance coverage, maternal health status, and child characteristics (see Table 2). Newborns had  
227 a higher prevalence of LBW if they were born to mothers who had completed primary education  
228 (4.4%) compared to higher education (p-value = 0.076), were unemployed job (7.4%) compared  
229 to other careers, or were from poor households (7.1%) compared to rich households (p-value =  
230 0.046), and born to rural area had a higher prevalence of LBW than those in urban areas (6.9% vs  
231 4.57%, p-value = 0.005). In addition, LBW prevalence among children born to mothers attending  
232 less than 4 ANC visits during pregnancy (8.6%) was significantly higher than for those born to  
233 mothers attending four or more ANC visits (5.5%) (p-value = 0.007). First-born babies had a  
234 higher LBW prevalence (8%) than second- and third-born babies (4.8%) and fourth-born or higher  
235 (6.4%) (p-value = 0.004). There were no differences in the prevalence of LBW between boy and  
236 girl babies, place and types of delivered, mother's age, marital status, smoking status, alcohol  
237 consumption, initial ANC in the first trimester, consumed iron supplement, took parasite

238 medication, adequate ANC components during pregnancy, perceptions of problems in accessing  
 239 health service, and health insurance coverage (see **Table 2**).

240  
 241 **Table 2.** Distribution of socio-demographic factors and proportion of newborns with LBW in Cambodia,  
 242 2021-2022 (N = 4,565, weighted count).  
 243

| Variables                                         | Low birth weight (N=272) |     |            | Normal weight (N=4,294) |      |             | P value      |
|---------------------------------------------------|--------------------------|-----|------------|-------------------------|------|-------------|--------------|
|                                                   | Freq.                    | %   | 95% CI     | Freq.                   | %    | 95% CI      |              |
| <b>Maternal Characteristics</b>                   |                          |     |            |                         |      |             |              |
| <b>Age at the time of giving birth</b>            |                          |     |            |                         |      |             |              |
| ≤ 19                                              | 71                       | 6.5 | (5.1-8.4)  | 1,012                   | 93.5 | (91.6-94.9) | 0.484        |
| 20-29                                             | 176                      | 5.6 | (4.7-6.7)  | 2,969                   | 94.4 | (93.3-95.3) |              |
| ≥ 30                                              | 25                       | 7.5 | (4.1-13.2) | 313                     | 92.5 | (86.8-95.9) |              |
| <b>Educational level</b>                          |                          |     |            |                         |      |             |              |
| No education                                      | 21                       | 4.4 | (2.7-7.0)  | 484                     | 95.6 | (93.0-97.3) | <b>0.076</b> |
| Primary                                           | 130                      | 7.1 | (5.7-8.6)  | 1,842                   | 92.9 | (91.4-94.3) |              |
| Secondary/higher                                  | 120                      | 5.4 | (4.4-6.6)  | 2,240                   | 94.6 | (93.4-95.6) |              |
| <b>Employment status</b>                          |                          |     |            |                         |      |             |              |
| Not working                                       | 103                      | 7.4 | (5.9-9.3)  | 1,292                   | 92.6 | (90.7-94.1) | <b>0.014</b> |
| Professional                                      | 53                       | 4.2 | (3.0-5.7)  | 1,220                   | 95.8 | (94.3-97.0) |              |
| Non-professional                                  | 116                      | 6.1 | (5.0-7.5)  | 1,781                   | 93.9 | (92.5-95.0) |              |
| <b>Marital status</b>                             |                          |     |            |                         |      |             |              |
| Not married                                       | 17                       | 7.4 | (4.4-12.0) | 214                     | 92.6 | (88.0-95.6) | 0.387        |
| Married                                           | 255                      | 5.9 | (5.1-6.7)  | 4,080                   | 94.1 | (93.3-94.9) |              |
| <b>Smoking cigarettes</b>                         |                          |     |            |                         |      |             |              |
| Non-Smoker                                        | 267                      | 5.9 | (5.2-6.8)  | 4,248                   | 94.1 | (93.2-94.8) | 0.512        |
| Smoker                                            | 4                        | 8.5 | (2.8-23.2) | 46                      | 91.5 | (76.8-97.2) |              |
| <b>Alcohol intake in the past month</b>           |                          |     |            |                         |      |             |              |
| No                                                | 171                      | 5.9 | (4.9-7.0)  | 2,739                   | 94.1 | (93.0-95.1) | 0.832        |
| Yes                                               | 100                      | 6.1 | (4.9-7.5)  | 1,555                   | 93.9 | (92.5-95.1) |              |
| <b>Number of ANC visits during pregnancy</b>      |                          |     |            |                         |      |             |              |
| < 4 visits                                        | 54                       | 8.6 | (6.5-11.3) | 571                     | 91.4 | (88.7-93.5) | <b>0.007</b> |
| ≥ 4 visits                                        | 218                      | 5.5 | (4.7-6.4)  | 3,722                   | 94.5 | (93.6-95.3) |              |
| <b>First ANC visit in the first trimester</b>     |                          |     |            |                         |      |             |              |
| No                                                | 36                       | 7.2 | (5.0-10.3) | 465                     | 92.8 | (89.7-95.0) | 0.294        |
| Yes                                               | 233                      | 5.8 | (5.0-6.7)  | 3,774                   | 94.2 | (93.3-95.0) |              |
| <b>Antenatal care from a skilled provider</b>     |                          |     |            |                         |      |             |              |
| Unskilled                                         | 2                        | 3.6 | (0.9-12.9) | 59                      | 96.4 | (87.1-99.1) | 0.444        |
| Skilled                                           | 269                      | 6.0 | (5.2-6.8)  | 4,235                   | 94.0 | (93.2-94.8) |              |
| <b>Tetanus toxoid injections during pregnancy</b> |                          |     |            |                         |      |             |              |
| None                                              | 43                       | 5.6 | (4.0-7.9)  | 724                     | 94.4 | (92.1-96.0) | 0.929        |
| One dose                                          | 41                       | 6.1 | (4.4-8.4)  | 625                     | 93.9 | (91.6-95.6) |              |
| Two or more                                       | 188                      | 6.0 | (5.1-7.1)  | 2,945                   | 94.0 | (92.9-94.9) |              |
| <b>Iron supplementation during pregnancy</b>      |                          |     |            |                         |      |             |              |
| No                                                | 33                       | 6.7 | (4.7-9.4)  | 466                     | 93.3 | (90.6-95.3) | 0.500        |
| Yes                                               | 238                      | 5.9 | (5.1-6.7)  | 3,828                   | 94.1 | (93.3-94.9) |              |
| <b>Parasite medication during pregnancy</b>       |                          |     |            |                         |      |             |              |

|                                       |     |     |            |       |      |             |              |
|---------------------------------------|-----|-----|------------|-------|------|-------------|--------------|
| No                                    | 52  | 6.5 | (4.6-9.1)  | 754   | 93.5 | (90.9-95.4) | 0.583        |
| Yes                                   | 219 | 5.8 | (5.0-6.7)  | 3,540 | 94.2 | (93.3-95.0) |              |
| <b>Compliance with ANC components</b> |     |     |            |       |      |             |              |
| Inadequate                            | 110 | 6.1 | (5.0-7.5)  | 1,687 | 93.9 | (92.5-95.0) | 0.745        |
| Adequate                              | 162 | 5.8 | (4.9-7.0)  | 2,607 | 94.2 | (93.0-95.1) |              |
| <b>Healthcare Barriers</b>            |     |     |            |       |      |             |              |
| No barrier                            | 101 | 5.4 | (4.2-6.8)  | 1,768 | 94.6 | (93.2-95.8) | 0.277        |
| One or More Barriers                  | 171 | 6.3 | (5.4-7.5)  | 2,525 | 93.7 | (92.5-94.6) |              |
| <b>Health insurance coverage</b>      |     |     |            |       |      |             |              |
| No                                    | 216 | 6.3 | (5.4-7.3)  | 3,216 | 93.7 | (92.7-94.6) | 0.141        |
| Yes                                   | 55  | 4.9 | (3.6-6.6)  | 1,078 | 95.1 | (93.4-96.4) |              |
| <b>Place of birth</b>                 |     |     |            |       |      |             |              |
| Home                                  | 13  | 8.7 | (4.8-15.1) | 134   | 91.3 | (84.9-95.2) | 0.195        |
| Health facilities                     | 259 | 5.9 | (5.1-6.7)  | 4,159 | 94.1 | (93.3-94.9) |              |
| <b>Child's characteristics</b>        |     |     |            |       |      |             |              |
| <b>Sex of child</b>                   |     |     |            |       |      |             |              |
| Female                                | 145 | 6.5 | (5.3-7.9)  | 2,088 | 93.5 | (92.1-94.7) | 0.247        |
| Male                                  | 127 | 5.4 | (4.4-6.7)  | 2,206 | 94.6 | (93.3-95.6) |              |
| <b>Child's birth interval (year)</b>  |     |     |            |       |      |             |              |
| First child                           | 117 | 7.9 | (6.4-9.8)  | 1,362 | 92.1 | (90.2-93.6) | <b>0.012</b> |
| < 2 years                             | 15  | 5.1 | (2.8-8.9)  | 290   | 94.9 | (91.1-97.2) |              |
| 2-3 years                             | 26  | 5.2 | (3.4-7.7)  | 474   | 94.8 | (92.3-96.6) |              |
| Three or more                         | 113 | 5.0 | (4.0-6.1)  | 2,168 | 95.0 | (93.9-96.0) |              |
| <b>Child's birth order</b>            |     |     |            |       |      |             |              |
| 1st child                             | 117 | 7.9 | (6.4-9.8)  | 1,362 | 92.1 | (90.2-93.6) | <b>0.004</b> |
| 2-3 child                             | 124 | 4.8 | (3.9-5.8)  | 2,495 | 95.2 | (94.2-96.1) |              |
| Four or more                          | 30  | 6.4 | (4.2-9.6)  | 437   | 93.6 | (90.4-95.8) |              |
| <b>Type of delivery</b>               |     |     |            |       |      |             |              |
| Normal Delivery                       | 220 | 5.9 | (5.1-6.8)  | 3,497 | 94.1 | (93.2-94.9) | 0.883        |
| Cesarean Section                      | 52  | 6.1 | (4.2-8.7)  | 797   | 93.9 | (91.3-95.8) |              |
| <b>Household characteristics</b>      |     |     |            |       |      |             |              |
| <b>Wealth index</b>                   |     |     |            |       |      |             |              |
| Poor                                  | 130 | 7.1 | (5.8-8.6)  | 1,706 | 92.9 | (91.4-94.2) | <b>0.046</b> |
| Middle                                | 52  | 6.1 | (4.6-8.1)  | 796   | 93.9 | (91.9-95.4) |              |
| Rich                                  | 90  | 4.8 | (3.7-6.2)  | 1,793 | 95.2 | (93.8-96.3) |              |
| <b>Type of toilet facility</b>        |     |     |            |       |      |             |              |
| Improved                              | 229 | 5.7 | (5.0-6.6)  | 3,771 | 94.3 | (93.4-95.0) | 0.104        |
| Non-Improved                          | 43  | 7.5 | (5.5-10.2) | 523   | 92.5 | (89.8-94.5) |              |
| <b>Source of drinking water</b>       |     |     |            |       |      |             |              |
| Improved                              | 165 | 6.0 | (5.0-7.2)  | 2,582 | 94.0 | (92.8-95.0) | 0.844        |
| Unimproved                            | 106 | 5.8 | (4.7-7.2)  | 1,712 | 94.2 | (92.8-95.3) |              |
| <b>Place of residence</b>             |     |     |            |       |      |             |              |
| Urban                                 | 80  | 4.5 | (3.4-5.8)  | 1,709 | 95.5 | (94.2-96.6) | <b>0.005</b> |
| Rural                                 | 192 | 6.9 | (6.0-8.0)  | 2,584 | 93.1 | (92.0-94.0) |              |
| <b>Geographic Region</b>              |     |     |            |       |      |             |              |
| Plain                                 | 134 | 6.0 | (4.9-7.3)  | 2,105 | 94.0 | (92.7-95.1) | 0.671        |
| Tonle Sap                             | 77  | 5.5 | (4.3-6.9)  | 1,331 | 94.5 | (93.1-95.7) |              |
| Coastal                               | 16  | 5.9 | (3.7-9.1)  | 254   | 94.1 | (90.9-96.3) |              |

|                  |    |     |           |     |      |             |
|------------------|----|-----|-----------|-----|------|-------------|
| Plateau/Mountain | 45 | 6.9 | (5.4-8.8) | 604 | 93.1 | (91.2-94.6) |
|------------------|----|-----|-----------|-----|------|-------------|

244 *Notes: Survey weights are applied to obtain weighted percentages.*

245  
246  
247  
248 **Factors associated with LBW among the most recent live births in multiple**  
249 **logistic regression**

250  
251 As shown in **Table 3**, several factors were independently associated with increased odds of being  
252 LBW among newborns with the most recent live births in the two years preceding the survey.  
253 These factors included children born to mothers with primary education (AOR = 1.82; 95% CI:  
254 1.09–3.04) and unemployed mothers (AOR = 1.62; 95% CI: 1.03–2.55). Being a first-born child  
255 was still strongly associated with LBW (AOR = 1.74; 95% CI: 1.24–2.45) compared with being  
256 the second child. Children born to mothers in rural areas had 1.42 times higher odds of LBW than  
257 those born to urban mothers (AOR = 1.42; 95% CI: 1.00–2.01). However, mothers who attended  
258 at least 4 ANC visits during their last pregnancy had 0.65 times lower odds of LBW compared  
259 with women having less than 4 ANC visits (AOR = 0.65; 95% CI: 0.47–0.91). We did not find  
260 that the effects of mothers' age and household wealth index were statistically insignificant after  
261 adjusting for other confounding factors in the multiple logistic regression model.

262  
263 **Table 3.** Factors associated with LBW among the most recent live births in Cambodia, CDHS 2021-2022  
264

| Variables                              | Total Births (N=4,565) |                      | Total Births (N=4,565) |                      |
|----------------------------------------|------------------------|----------------------|------------------------|----------------------|
|                                        | OR                     | 95% CI               | AOR                    | 95% CI               |
| <b>Maternal Characteristics</b>        |                        |                      |                        |                      |
| <b>Age at the time of giving birth</b> |                        |                      |                        |                      |
| ≤ 19                                   | Ref.                   |                      | Ref.                   |                      |
| 20-29                                  | 0.85                   | (0.60 - 1.19)        | 0.96                   | (0.68 - 1.35)        |
| ≥ 30                                   | 1.16                   | (0.58 - 2.32)        | 1.25                   | (0.65 - 2.41)        |
| <b>Educational level</b>               |                        |                      |                        |                      |
| No education                           | Ref.                   |                      | Ref.                   |                      |
| Primary                                | <b>1.66*</b>           | <b>(0.96 - 2.86)</b> | <b>1.82**</b>          | <b>(1.09 - 3.04)</b> |
| Secondary/higher                       | 1.24                   | (0.72 - 2.13)        | 1.47                   | (0.86 - 2.52)        |
| <b>Employment status</b>               |                        |                      |                        |                      |
| Not working                            | <b>1.84***</b>         | <b>(1.20 - 2.82)</b> | <b>1.62**</b>          | <b>(1.03 - 2.55)</b> |
| Professional                           | Ref.                   |                      | Ref.                   |                      |
| Non-professional                       | <b>1.50**</b>          | <b>(1.01 - 2.21)</b> | 1.35                   | (0.89 - 2.07)        |
| <b>Marital status</b>                  |                        |                      |                        |                      |
| Not married                            | Ref.                   |                      |                        |                      |

|                                                   |                |                      |                |                      |
|---------------------------------------------------|----------------|----------------------|----------------|----------------------|
| Married                                           | 0.78           | (0.45 - 1.36)        |                |                      |
| <b>Smoking cigarettes</b>                         |                |                      |                |                      |
| Non-Smoker                                        | Ref.           |                      |                |                      |
| Smoker                                            | 1.48           | (0.45 - 4.83)        |                |                      |
| <b>Alcohol intake in the past month</b>           |                |                      |                |                      |
| No                                                | Ref.           |                      |                |                      |
| Yes                                               | 1.03           | (0.77 - 1.39)        |                |                      |
| <b>Number of ANC visits during pregnancy</b>      |                |                      |                |                      |
| < 4 visits                                        | Ref.           |                      | Ref.           |                      |
| ≥ 4 visits                                        | <b>0.62***</b> | <b>(0.44 - 0.88)</b> | <b>0.65**</b>  | <b>(0.47 - 0.91)</b> |
| <b>First ANC visit in the first trimester</b>     |                |                      |                |                      |
| No                                                | Ref.           |                      |                |                      |
| Yes                                               | 0.80           | (0.52 - 1.22)        |                |                      |
| <b>Antenatal care from a skilled provider</b>     |                |                      |                |                      |
| Unskilled                                         | Ref.           |                      |                |                      |
| Skilled                                           | 1.70           | (0.43 - 6.77)        |                |                      |
| <b>Tetanus toxoid injections during pregnancy</b> |                |                      |                |                      |
| None                                              | Ref.           |                      |                |                      |
| One dose                                          | 1.10           | (0.66 - 1.82)        |                |                      |
| Two or more                                       | 1.07           | (0.71 - 1.61)        |                |                      |
| <b>Iron supplementation during pregnancy</b>      |                |                      |                |                      |
| No                                                | Ref.           |                      |                |                      |
| Yes                                               | 0.87           | (0.58 - 1.30)        |                |                      |
| <b>Parasite medication during pregnancy</b>       |                |                      |                |                      |
| No                                                | Ref.           |                      |                |                      |
| Yes                                               | 0.89           | (0.59 - 1.34)        |                |                      |
| <b>Compliance with ANC components</b>             |                |                      |                |                      |
| Inadequate                                        | Ref.           |                      |                |                      |
| Adequate                                          | 0.95           | (0.71 - 1.28)        |                |                      |
| <b>Healthcare Barriers</b>                        |                |                      |                |                      |
| No barrier                                        | Ref.           |                      |                |                      |
| One or more barriers                              | 1.19           | (0.87 - 1.63)        |                |                      |
| <b>Health insurance coverage</b>                  |                |                      |                |                      |
| No                                                | Ref.           |                      |                |                      |
| Yes                                               | 0.76           | (0.53 - 1.10)        |                |                      |
| <b>Place of birth</b>                             |                |                      |                |                      |
| Home                                              | Ref.           |                      |                |                      |
| Health facilities                                 | 0.65           | (0.34 - 1.25)        |                |                      |
| <b>Child's characteristics</b>                    |                |                      |                |                      |
| <b>Sex of child</b>                               |                |                      |                |                      |
| Female                                            | Ref.           |                      |                |                      |
| Male                                              | 0.83           | (0.60 - 1.14)        |                |                      |
| <b>Child's birth interval (year)</b>              |                |                      |                |                      |
| First child                                       | Ref.           |                      |                |                      |
| < 2 years                                         | 0.62           | (0.32 - 1.18)        |                |                      |
| 2-3 years                                         | <b>0.63*</b>   | <b>(0.39 - 1.03)</b> |                |                      |
| Three or more                                     | <b>0.60***</b> | <b>(0.43 - 0.85)</b> |                |                      |
| <b>Child's birth order</b>                        |                |                      |                |                      |
| 1st child                                         | <b>1.73***</b> | <b>(1.24 - 2.40)</b> | <b>1.74***</b> | <b>(1.24 - 2.45)</b> |
| 2-3 child                                         | Ref.           |                      | Ref.           |                      |
| Four or more                                      | 1.36           | (0.82 - 2.27)        | 1.27           | (0.78 - 2.09)        |
| <b>Type of delivery</b>                           |                |                      |                |                      |
| Normal Delivery                                   | Ref.           |                      |                |                      |
| Cesarean Section                                  | 1.03           | (0.67 - 1.58)        |                |                      |

**Household characteristics**

**Wealth index**

|        |        |               |      |               |
|--------|--------|---------------|------|---------------|
| Poor   | 1.51** | (1.07 - 2.13) | 1.05 | (0.69 - 1.59) |
| Middle | 1.29   | (0.85 - 1.95) | 1.01 | (0.64 - 1.58) |
| Rich   | Ref.   |               | Ref. |               |

**Type of toilet facility**

|              |      |               |  |  |
|--------------|------|---------------|--|--|
| Improved     | Ref. |               |  |  |
| Non-Improved | 1.34 | (0.94 - 1.91) |  |  |

**Source of drinking water**

|            |      |               |  |  |
|------------|------|---------------|--|--|
| Improved   | Ref. |               |  |  |
| Unimproved | 0.97 | (0.71 - 1.32) |  |  |

**Place of residence**

|       |         |               |       |               |
|-------|---------|---------------|-------|---------------|
| Urban | Ref.    |               | Ref.  |               |
| Rural | 1.59*** | (1.15 - 2.21) | 1.42* | (1.00 - 2.01) |

**Geographic Region**

|                  |      |               |  |  |
|------------------|------|---------------|--|--|
| Plain            | Ref. |               |  |  |
| Tonle Sap        | 0.91 | (0.65 - 1.27) |  |  |
| Coastal          | 0.98 | (0.58 - 1.66) |  |  |
| Plateau/Mountain | 1.16 | (0.82 - 1.64) |  |  |

265  
266  
267  
268  
269

Notes: Survey weights are applied to obtain weighted percentages.

Ref: Reference value.

\*\*\* p<0.01, \*\* p<0.05, \* p<0.1.

270

271 **Discussion**

272

273 The overall prevalence of LBW among newborns in Cambodia was 5.9% (95% CI: 5.2–6.8), which  
 274 was lower than the percentage of LBW newborns that was 11% in 2000, 8% in 2005, and 7.9% in  
 275 2010 and 2014 [5,6,30], and lower than to the prevalence of LBW among newborns in South Asia  
 276 was 24.9%, and global was 14% in 2020 [31]. The reduction in the prevalence of LBW  
 277 corresponded with Cambodia's efforts to reduce the mortality of neonates, infants, and those under  
 278 five [7]. It might be attributed to the efforts and initiative of the Royal Government of Cambodia  
 279 (RGC), which has strengthened health facilities across the country, particularly in rural areas,  
 280 improved infrastructure, provided essential medical equipment and supplies, increased the number  
 281 of midwives, expanded quality of antenatal care during pregnancy from a skilled provider, and  
 282 provided more skilled medical practitioners at childbirth to ensure safe delivery practices at health  
 283 facilities [24,32,33]. Moreover, the achievement can be attributed to the country's concerted effort  
 284 to increase women's access to maternal health services [34]. Recent CDHS 2021-2022 indicated  
 285 that institutional births dramatically increased, from 19.3% to 98%, had four or more ANC visits  
 286 increased, from 9% to 86.1%, and had their first ANC visit during the first trimester also

287 significantly increased from 10% to 87% between 2000 and 2022 [7]. In 2022, 98% of women  
288 took iron tablets or syrup, while 84% took intestinal parasite medications [7]. Recently, to  
289 encourage early and routine ANC visits, the government has offered pregnant women a monetary  
290 incentive of US\$20 for each visit during a maximum of four ANC visits at any health facility with  
291 a contract with the National Social Security Fund (NSSF) [35,36].

292  
293 The variation in the prevalence of LBW among newborns is highest in low-economic provinces  
294 such as Ratanak Kiri, Kratie, Pailin, Svay Rieng, and Stung Treng (see **Fig 1**). This may be due,  
295 at least in part, to limited implementation and enforcement of these policies and interventions in  
296 remote areas of the country [14].

297  
298 Our study found several factors associated with increased odds of having LBW among newborns  
299 in Cambodia, including being born to mothers with primary education, being unemployed, being  
300 a first-born child, and being born to mothers in rural areas. However, mothers who attended at  
301 least four ANC visits during their last pregnancy were less likely to have LBW babies.

302 Mothers with primary schooling were 1.82 times more likely to have an LBW baby compared with  
303 those with a secondary or higher education, which is similar to the findings of 3 studies in other  
304 countries that the illiteracy of mothers is a risk factor for LBW [17,37,38]. This finding might be  
305 explained by the fact that highly educated mothers might have access to books and more education  
306 programs that help to better living conditions, knowledge of health processes such as antenatal  
307 care and nutrition, and access to quality healthcare services, all of which positively impact pregnant  
308 outcomes [9,25,26]. Similarly, unemployed mothers were 1.62 times more likely to have an LBW  
309 baby compared with those employed. This association is consistent with previous studies [39,40].  
310 While a survey in several developing countries found that poverty is a risk factor for LBW  
311 [17,23,40,41], the present study found that these factors, although significantly associated with  
312 LBW in simple logistic regression analysis, were no relationship with LBW after controlling  
313 confounding factors in the multivariate logistic regression. Also, maternal age is considered a key  
314 factor for LBW [23,40]. This study reveals no statistical association between maternal age and low  
315 birth weight.

316



317 The study's finding that mothers who received four or more ANC visits during their last pregnancy  
318 were 0.65 times less likely to have babies with LBW, compared with mothers who attended fewer  
319 than 4 ANC visits, is also in line with other studies elsewhere [17,42]. Therefore, the finding  
320 supports Cambodia's MoH and WHO's current national policy, which recommends at least 4 ANC  
321 visits during pregnancy [33]. Mothers with at least 4 ANC visits may receive proper ANC  
322 components such as weight monitoring, blood pressure measurement, blood sample collected,  
323 urine sample collected, nutrition counseling, ultrasound conducted, received counseling on danger  
324 signs, received two tetanus shots, received preventive deworming, received food supplements, and  
325 took iron and folic acid pills during the pregnancy [43]. This finding that the first child is more  
326 likely to have LBW compared with the second or third child is also in line with studies conducted  
327 in Cambodia by Chhea et al. 2018 [17]. The study found that children born to mothers' residences  
328 in rural were 1.42 times more likely to have low birth weight babies. This association is consistent  
329 with previous studies [44]. A study in several developing countries found that rural residence is a  
330 risk factor for LBW [41]. This may be due, in part, to the limited implementation and enforcement  
331 of these policies and interventions in remote areas of the country. Rural areas have a higher poverty  
332 rate and restricted access to antenatal care services than urban areas [45,46].

### 333 **Strengths and limitations**

334  
335 Our study has several strengths. First, this study used the most recent data from a nationally  
336 representative households survey with a high response rate of 97%. Data were collected using  
337 validated survey methods and highly trained data collectors, contributing to improved data quality.  
338 Second, the analysis was restricted to the last newborns with the most recent live births in the two  
339 years preceding the survey to explore variations of the LBW outcome across provinces, using  
340 recorded or recalled birthweight. This study's findings contributed to the global prior prevalence  
341 of LBW and theoretical factors associated with LBW among newborns in Cambodia. Third,  
342 incorporating the DHS complex survey design and sampling weights into the analysis, it checked  
343 multicollinearity between independent variables and used a multiple logistic regression model to  
344 adjust for significant variables that may confound the association with LBW.

345  
346 However, this study has several significant limitations. First, because CDHS 2021-2022 was  
347 collected as a cross-sectional nature of the data, the study is limited to associations of variables

348 and not causality; the available data was obtained during the household survey, not during  
349 pregnancy or at the time of birth. While many variables, such as maternal age at birth, household  
350 wealth index, and place of residence, are unlikely to have changed, others, such as maternal  
351 employment status and marital status, may have changed between pregnancy or delivery and the  
352 survey. Another issue was dealing with missing data on the outcome variable for LBW. However,  
353 the problem is minor because less than 1% of the data was missing (CDHS 2021–2022). Second,  
354 it was restricted to independent variables for which CDHS 2021–2022 collected data. Many  
355 potential risk factors or contributing factors to low birth weight (LBW) were not well-documented.  
356 These included maternal malnutritional status (including anemia and weight gain during  
357 pregnancy), HIV infection, young married age, low birth weight, history of preterm births, and  
358 morbidity and illnesses during pregnancy, including non-communicable diseases like hypertension  
359 and diabetes.

360

## 361 **Conclusions**

362

363 The findings suggest the overall prevalence of LBW is slightly decreased compared to CDHS 2014  
364 and marginally lower compared to the Southsea Asia region. However, provincial variations in the  
365 prevalence of LBW were high in remote areas, and independent factors associated with LBW were  
366 identified. Interventions to reduce LBW should target provinces with relatively high prevalence,  
367 such as Ratanak Kiri, Kratie, Pailin, and Svay Rieng. Furthermore, the study shows that the  
368 mother's educational level, unemployment, number of ANC visits during the last pregnancy,  
369 child's birth order, and rural residence are significantly associated with LBW. These results  
370 strongly support and reconfirm Cambodia's current national program policy that recommends  
371 pregnant women attend four or more ANC appointments during pregnancy. This policy should be  
372 further reinforced and implemented, considering finding effective ways to introduce pregnant who  
373 have limited education to promoting the quality of antenatal care among women in rural settings.

374

## 375 **Acknowledgments**

376

377 The authors are grateful to DHS-ICF for gathering, cleaning, and providing the data used for this  
378 paper. We thank Dr. **Phorn Sreyphreak** from the Khema Clinic in Phnom Penh, Cambodia, for her  
379 feedback and support.

380

## 381 **Abbreviations**

382

383 ANC; Antenatal care, AOR; Adjusted odds ratio, CDHS; Cambodia Demographic Health Survey,  
384 EA; Enumeration areas, IFA; Iron folic acid, LBW; Low birth weight, NCDs; Non-communicable  
385 diseases, NECHR; National Ethical Committee for Health Research, NSSF; National Social  
386 Security Fund, RGC, Royal Government of Cambodia, PPS; Probability proportional to size,  
387 WHO; World Health Organization.

## 389 References

390

- 391 1. World Health organization (WHO). Global nutrition targets 2025: low birth weight policy brief.  
392 Available from: <https://www.who.int/publications/i/item/WHO-NMH-NHD-14.5>.
- 393 2. United Nations International Children's Emergency Fund (UNICEF). Low birth weight Last update:  
394 July 2023. Available from: <https://data.unicef.org/topic/nutrition/low-birthweight/>.
- 395 3. Marete I, Ekhaguere O, Bann CM, Bucher SL, Nyongesa P, Patel AB, et al. Regional trends in birth  
396 weight in low- and middle-income countries 2013-2018. *Reprod Health*. 2020;17(Suppl 3):176. Epub  
397 20201217. doi: 10.1186/s12978-020-01026-2. PubMed PMID: 33334365; PubMed Central PMCID:  
398 PMCPMC7745347.
- 399 4. UNICEF-WHO. Low birthweight estimates: Levels and trends 2000-2015. Geneva: World Health  
400 Organization; 2019 Available from: <https://www.who.int/publications/i/item/WHO-NMH-NHD-19.21>.
- 401 5. National Institute of Statistics, Directorate General for Health, and ICF International. Cambodia  
402 Demographic and Health Survey 2014. Phnom Penh, Cambodia, and Rockville, Maryland, USA: National  
403 Institute of Statistics, Directorate General for Health, and ICF International. Available online:  
404 <https://dhsprogram.com/pubs/pdf/fr312/fr312.pdf>. 2015.
- 405 6. National Institute of Statistics, Directorate General for Health, and ICF Macro. Cambodia  
406 Demographic and Health Survey 2010. Phnom Penh, Cambodia and Calverton, Maryland, USA: National  
407 Institute of Statistics, Directorate General for Health, and ICF Macro. 2010. Available online:  
408 <https://dhsprogram.com/pubs/pdf/Fr249/Fr249.pdf>. 2011.
- 409 7. National Institute of Statistics PP, Cambodia, Ministry of Health Phnom Penh, Cambodia, The  
410 DHS Program, ICF, Rockville, Maryland, USA. Cambodia Demographic and Health Survey 2021–22.  
411 Phnom Penh, Cambodia, and Rockville, Maryland, USA: NIS, MoH, and ICF. 2022.
- 412 8. World Health organization (WHO). World Life Expectancy electronic data 2020. Available from:  
413 <http://www.worldlifeexpectancy.com/cambodia-low-birth-weight>.
- 414 9. Um S, Sopheab H. The Factors Associated with Under-five Mortality in Cambodia: Data Analysis  
415 of the Cambodia Demographic and Health Survey. *Cambodia Journal of Public Health (CJPH) of the*  
416 *School of Public Health at NIPH*. 2021;2(12).
- 417 10. Lawn JE, Cousens S, Zupan J. 4 million neonatal deaths: when? Where? Why? *Lancet*.  
418 2005;365(9462):891-900. doi: 10.1016/s0140-6736(05)71048-5. PubMed PMID: 15752534.
- 419 11. Alexander GR, Wingate MS, Bader D, Kogan MD. The increasing racial disparity in infant  
420 mortality rates: composition and contributors to recent US trends. *Am J Obstet Gynecol*.  
421 2008;198(1):51.e1-9. Epub 20070917. doi: 10.1016/j.ajog.2007.06.006. PubMed PMID: 17870043.
- 422 12. Bianchi ME, Restrepo JM. Low Birthweight as a Risk Factor for Non-communicable Diseases in  
423 Adults. *Front Med (Lausanne)*. 2021;8:793990. Epub 20220106. doi: 10.3389/fmed.2021.793990. PubMed  
424 PMID: 35071274; PubMed Central PMCID: PMCPMC8770864.
- 425 13. Alexander BT, Henry Dasinger J, Intapad S. Effect of low birth weight on women's health. *Clin*  
426 *Ther*. 2014;36(12):1913-23. Epub 20140723. doi: 10.1016/j.clinthera.2014.06.026. PubMed PMID:  
427 25064626; PubMed Central PMCID: PMCPMC4268017.
- 428 14. National Maternal and Child Health Center. National Nutrition Program; Fast Track Road Map for  
429 Improving Nutrition 2014 - 2020. Available online [[https://nmchc.gov.kh/wp-](https://nmchc.gov.kh/wp-content/uploads/2021/07/FTRM-for-Nutrition_Eng_Final-May-2014with-signature.pdf)  
430 [content/uploads/2021/07/FTRM-for-Nutrition\\_Eng\\_Final-May-2014with-signature.pdf](https://nmchc.gov.kh/wp-content/uploads/2021/07/FTRM-for-Nutrition_Eng_Final-May-2014with-signature.pdf)]. . 2020.
- 431 15. Bhaskar RK, Deo KK, Neupane U, Chaudhary Bhaskar S, Yadav BK, Pokharel HP, et al. A Case  
432 Control Study on Risk Factors Associated with Low Birth Weight Babies in Eastern Nepal. *Int J Pediatr*.  
433 2015;2015:807373. Epub 20151210. doi: 10.1155/2015/807373. PubMed PMID: 26783406; PubMed  
434 Central PMCID: PMCPMC4689955.
- 435 16. Pusdekar YV, Patel AB, Kurhe KG, Bhargav SR, Thorsten V, Garces A, et al. Rates and risk factors  
436 for preterm birth and low birthweight in the global network sites in six low- and low middle-income

- 437 countries. *Reprod Health*. 2020;17(Suppl 3):187. Epub 20201217. doi: 10.1186/s12978-020-01029-z.  
438 PubMed PMID: 33334356; PubMed Central PMCID: PMC67745351.
- 439 17. Chhea C, Ir P, Sopheab H. Low birth weight of institutional births in Cambodia: Analysis of the  
440 Demographic and Health Surveys 2010-2014. *PLoS One*. 2018;13(11):e0207021. Epub 20181108. doi:  
441 10.1371/journal.pone.0207021. PubMed PMID: 30408102; PubMed Central PMCID: PMC6224106.
- 442 18. Figueiredo A, Gomes-Filho IS, Batista JET, Orrico GS, Porto ECL, Cruz Pimenta RM, et al.  
443 Maternal anemia and birth weight: A prospective cohort study. *PLoS One*. 2019;14(3):e0212817. Epub  
444 20190318. doi: 10.1371/journal.pone.0212817. PubMed PMID: 30884493; PubMed Central PMCID:  
445 PMC6422668.
- 446 19. Burnie R, Golob E, Clarke S. Pregnancy in underweight women: implications, management and  
447 outcomes. *The Obstetrician & Gynaecologist*. 2022;24(1):50-7.
- 448 20. Zheng W, Suzuki K, Tanaka T, Kohama M, Yamagata Z. Association between Maternal Smoking  
449 during Pregnancy and Low Birthweight: Effects by Maternal Age. *PLoS One*. 2016;11(1):e0146241. Epub  
450 20160121. doi: 10.1371/journal.pone.0146241. PubMed PMID: 26795494; PubMed Central PMCID:  
451 PMC4721610.
- 452 21. Chen J-H. Maternal Alcohol Use during Pregnancy, Birth Weight and Early Behavioral Outcomes.  
453 *Alcohol and Alcoholism*. 2012;47(6):649-56. doi: 10.1093/alcalc/ags089.
- 454 22. Widiyanto J, Lismawati G. Maternal age and anemia are risk factors of low birthweight of newborn.  
455 *Enfermeria clinica*. 2019;29:94-7.
- 456 23. Alam MJ, Islam MM, Maniruzzaman M, Ahmed N, Tawabunnahar M, Rahman MJ, et al.  
457 Socioeconomic inequality in the prevalence of low birth weight and its associated determinants in  
458 Bangladesh. *PLoS One*. 2022;17(10):e0276718. Epub 20221027. doi: 10.1371/journal.pone.0276718.  
459 PubMed PMID: 36301890; PubMed Central PMCID: PMC9612499.
- 460 24. Royal Government of Cambodia (RGC); Council for Agriculture and Rural Development. The  
461 Second National Strategy for Food Security and Nutrition 2019-2023 2019. Available from:  
462 <https://scalingupnutrition.org/sites/default/files/2022-06/national-nutrition-plan-cambodia.pdf>.
- 463 25. Um S, Cope MR, Muir JA. Child anemia in Cambodia: A descriptive analysis of temporal and  
464 geospatial trends and logistic regression-based examination of factors associated with anemia in children.  
465 *PLOS Glob Public Health*. 2023;3(9):e0002082. Epub 20230915. doi: 10.1371/journal.pgph.0002082.  
466 PubMed PMID: 37713392; PubMed Central PMCID: PMC10503718.
- 467 26. Um S, Vang D, Pin P, Chau D. Trends and determinants of acute respiratory infection symptoms  
468 among under-five children in Cambodia: Analysis of 2000 to 2014 Cambodia demographic and health  
469 surveys. *PLOS Glob Public Health*. 2023;3(5):e0001440. Epub 20230503. doi:  
470 10.1371/journal.pgph.0001440. PubMed PMID: 37134089; PubMed Central PMCID: PMC10155954.
- 471 27. Demographic and Health Surveys (DHS). The Demographic and Health Surveys (DHS) Program;  
472 ICF: Rockville, MD, USA, 2020; Available online: [<https://dhsprogram.com/data/available-datasets.cfm>].  
473 2020.
- 474 28. Desktop A. Release 10.8. 1.(2020). ESRI (Environmental Systems Research Institute), Redlands,  
475 CA.
- 476 29. Midi H, Sarkar SK, Rana S. Collinearity diagnostics of binary logistic regression model. *Journal*  
477 *of interdisciplinary mathematics*. 2010;13(3):253-67.
- 478 30. National Institute of Public Health, National Institute of Statistics, and ORC Macro. Cambodia  
479 Demographic and Health Survey 2005. Phnom Penh, Cambodia and Calverton, Maryland, USA: National  
480 Institute of Public Health, National Institute of Statistics and ORC Macro. 2005. Available online:  
481 <https://dhsprogram.com/pubs/pdf/FR185/FR185%5BApril-27-2011%5D.pdf>. 2006.
- 482 31. UNICEF-WHO. Low birthweight estimates: Levels and trends 2000-2023. 2023. Available from:  
483 <https://data.unicef.org/topic/nutrition/low-birthweight/>.
- 484 32. Ministry of Health. Guideline for implementation the service package of Antenatal Care Delivery  
485 and Post natal Care 2019 [updated 2019]. 3:[Available from:  
486 [https://niph.org.kh/niph/uploads/library/pdf/GL220\\_NMCHC\\_anc\\_pnc\\_package\\_eng.pdf](https://niph.org.kh/niph/uploads/library/pdf/GL220_NMCHC_anc_pnc_package_eng.pdf).

- 487 33. Ministry of Health. Health Strategic Plan Cambodia 2016-2020 2016. Available from:  
488 [http://hismohcambodia.org/public/fileupload/carousel/HSP3-\(2016-2020\).pdf](http://hismohcambodia.org/public/fileupload/carousel/HSP3-(2016-2020).pdf).
- 489 34. Acuin CS, Khor GL, Liabsuetrakul T, Achadi EL, Htay TT, Firestone R, et al. Maternal, neonatal,  
490 and child health in southeast Asia: towards greater regional collaboration. *Lancet*. 2011;377(9764):516-25.  
491 Epub 20110125. doi: 10.1016/s0140-6736(10)62049-1. PubMed PMID: 21269675; PubMed Central  
492 PMCID: PMC7159081.
- 493 35. Ministry of Information. Government Raises Allowances For Mothers And Children. Available  
494 from: <https://www.information.gov.kh/articles/108509>.
- 495 36. National Social Security Fund (NSSF). Health Insurance Scheme 2016. Available from:  
496 <https://www.nssf.gov.kh/health-care-scheme-2/>.
- 497 37. Godah MW, Beydoun Z, Abdul-Khalek RA, Safieddine B, Khamis AM, Abdulrahim S. Maternal  
498 Education and Low Birth Weight in Low- and Middle-Income Countries: Systematic Review and Meta-  
499 Analysis. *Matern Child Health J*. 2021;25(8):1305-15. Epub 20210504. doi: 10.1007/s10995-021-03133-  
500 3. PubMed PMID: 33945084.
- 501 38. Saville NM, Shrestha BP, Style S, Harris-Fry H, Beard BJ, Sen A, et al. Impact on birth weight and  
502 child growth of Participatory Learning and Action women's groups with and without transfers of food or  
503 cash during pregnancy: Findings of the low birth weight South Asia cluster-randomised controlled trial  
504 (LBWSAT) in Nepal. *PLoS One*. 2018;13(5):e0194064. Epub 20180509. doi:  
505 10.1371/journal.pone.0194064. PubMed PMID: 29742136; PubMed Central PMCID: PMC5942768.
- 506 39. Reynolds CME, McMahon LE, O'Malley EG, O'Brien O, Sheehan SR, Turner MJ. Maternal  
507 employment and pregnancy outcomes in a large European maternity hospital. *Eur J Obstet Gynecol Reprod*  
508 *Biol*. 2020;250:86-92. Epub 20200428. doi: 10.1016/j.ejogrb.2020.04.005. PubMed PMID: 32413667.
- 509 40. Manyeh AK, Kukula V, Odonkor G, Ekey RA, Adjei A, Narh-Bana S, et al. Socioeconomic and  
510 demographic determinants of birth weight in southern rural Ghana: evidence from Dodowa Health and  
511 Demographic Surveillance System. *BMC Pregnancy Childbirth*. 2016;16(1):160. Epub 20160715. doi:  
512 10.1186/s12884-016-0956-2. PubMed PMID: 27417308; PubMed Central PMCID: PMC4946169.
- 513 41. Mahumud RA, Sultana M, Sarker AR. Distribution and Determinants of Low Birth Weight in  
514 Developing Countries. *J Prev Med Public Health*. 2017;50(1):18-28. doi: 10.3961/jpmph.16.087. PubMed  
515 PMID: 28173687; PubMed Central PMCID: PMC5327679.
- 516 42. Huang A, Wu K, Zhao W, Hu H, Yang Q, Chen D. Attendance at prenatal care and adverse birth  
517 outcomes in China: A follow-up study based on Maternal and Newborn's Health Monitoring System.  
518 *Midwifery*. 2018;57:26-31. Epub 20171114. doi: 10.1016/j.midw.2017.10.018. PubMed PMID: 29144978.
- 519 43. Neupane S, Scott S, Piwoz E, Kim SS, Menon P, Nguyen PH. More is not enough: High quantity  
520 and high quality antenatal care are both needed to prevent low birthweight in South Asia. *PLOS Glob Public*  
521 *Health*. 2023;3(6):e0001991. Epub 20230608. doi: 10.1371/journal.pgph.0001991. PubMed PMID:  
522 37289728; PubMed Central PMCID: PMC10249805.
- 523 44. Kundu RN, Ghosh A, Chhetri B, Saha I, Hossain MG, Bharati P. Regional with urban-rural  
524 variation in low birth weight and its determinants of Indian children: findings from National Family Health  
525 Survey 5 data. *BMC Pregnancy Childbirth*. 2023;23(1):616. Epub 20230828. doi: 10.1186/s12884-023-  
526 05934-6. PubMed PMID: 37641012; PubMed Central PMCID: PMC10464394.
- 527 45. Um S, Sopheab H, Yom A, Muir JA. Anemia among pregnant women in Cambodia: A descriptive  
528 analysis of temporal and geospatial trends and logistic regression-based examination of factors associated  
529 with anemia in pregnant women. *PLoS One*. 2023;18(12):e0274925. Epub 20231207. doi:  
530 10.1371/journal.pone.0274925. PubMed PMID: 38060474; PubMed Central PMCID: PMC10703242.
- 531 46. National Institute of Statistics. Ministry of Planning. General population census of the Kingdom of  
532 Cambodia 2019. Available from:  
533 [https://www.nis.gov.kh/nis/Census2019/Final%20General%20Population%20Census%202019-  
534 English.pdf](https://www.nis.gov.kh/nis/Census2019/Final%20General%20Population%20Census%202019-English.pdf).

537 **Supporting information**

538 **S1 Table.** Prevalence of LBW among newborns, CDHS 2021-2022 (n= 4,565 weighted count)

539

540

541

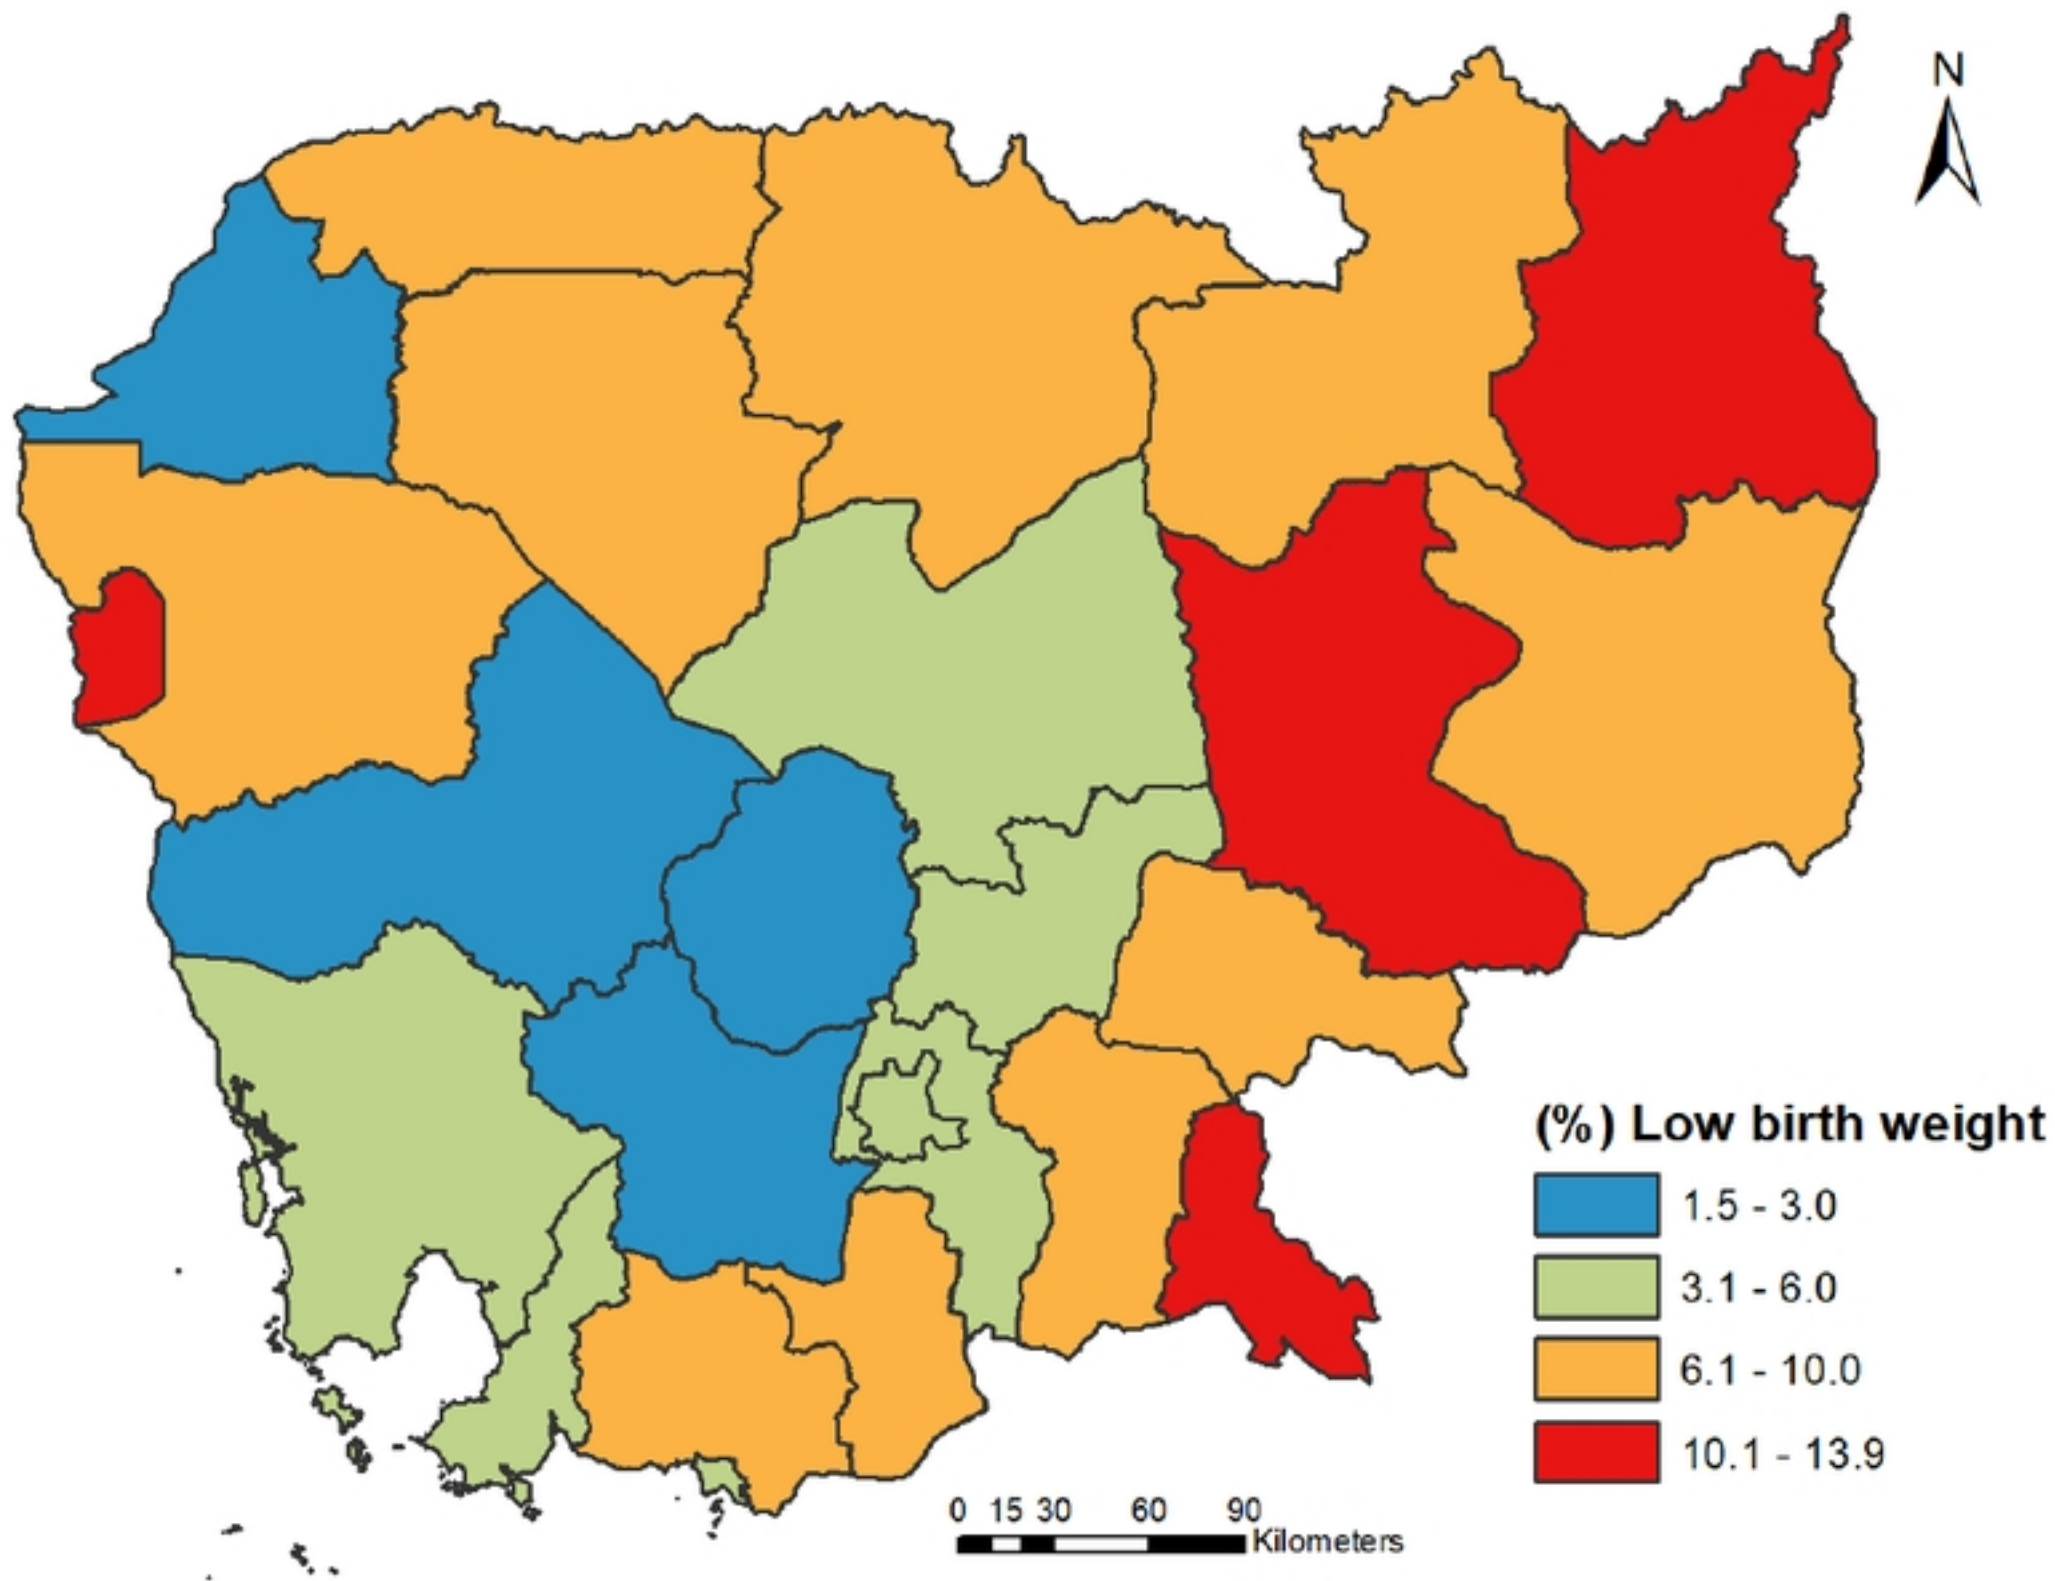

Fig1
